# Supplementary material for: Nitrogen- and Sulfur-Codoped Strong Green Fluorescent Carbon Dots for the Highly Specific Quantification of Quercetin in Food Samples
Source: MDPI journal article supplement (doi:10.3390/ma16247686), 2023-12-17
Supplement: s1 [file s1]

## Supporting Information

| S.No.      | Captions                                                                                                           | Page No. |
|------------|--------------------------------------------------------------------------------------------------------------------|----------|
| Figure S1. | FT-IR spectra of NS-CDs.                                                                                           | S1       |
| Figure S2. | XPS survey scan of NS-CDs.                                                                                         | S2       |
| Figure S3. | Effect of time on the fluorescence intensity of NS-CDs in the presence of QT (10 $\mu$ M) at room temperature.     | S2       |
| Figure S4. | pH-induced change in fluorescence intensity of NS-CDs at room temperature.                                         | S3       |
| Figure S5. | Stern–Volmer plot of the quenching of fluorescence of NS-CDs by QT in the concentration range of 3.3–16.5 $\mu$ M. | S3       |

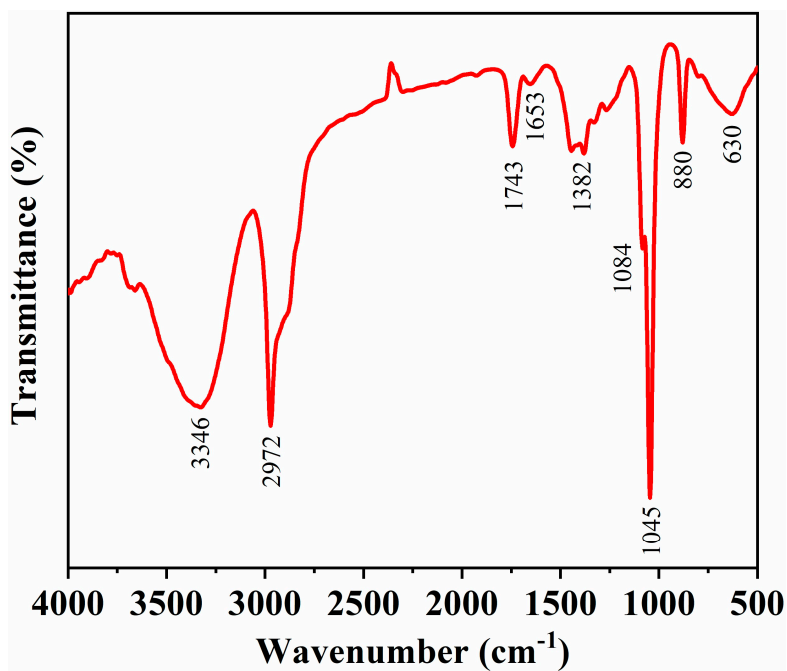

**Figure S1.** FT-IR spectra of NS-CDs.

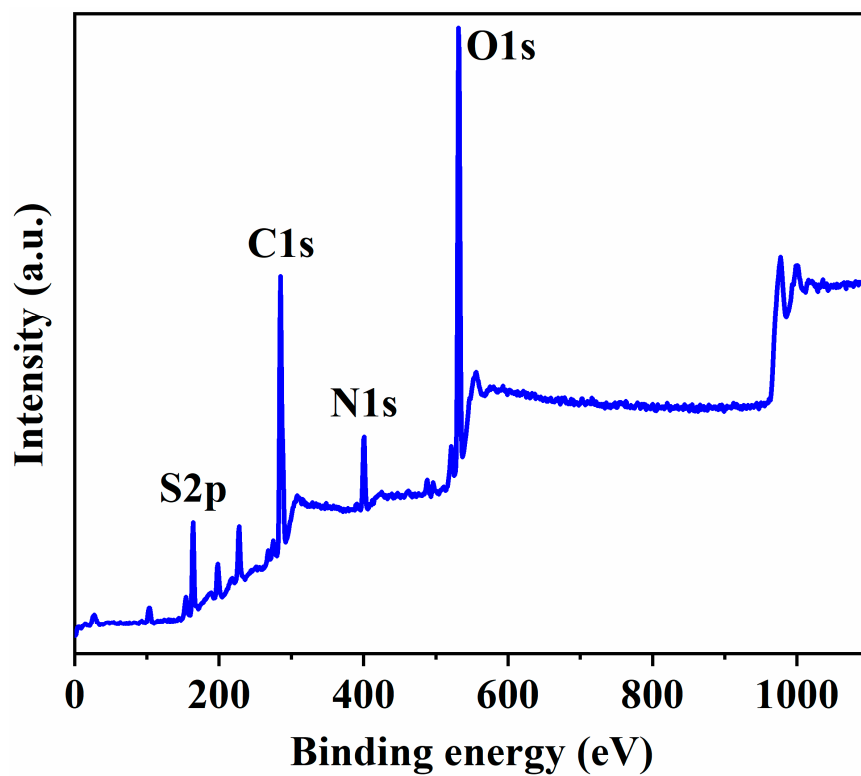

**Figure S2.** XPS survey scan of NS-CDs.

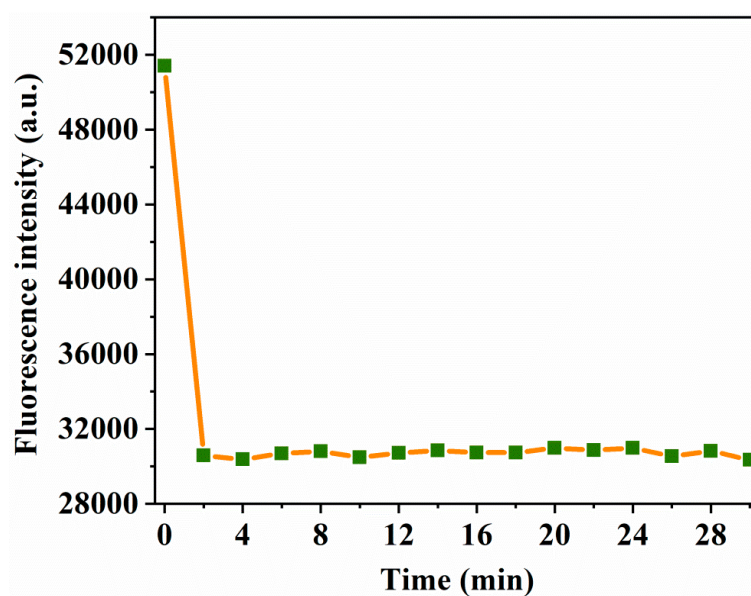

**Figure S3.** Effect of time on the fluorescence intensity of NS-CDs in the presence of QT (10  $\mu$ M) at room temperature.

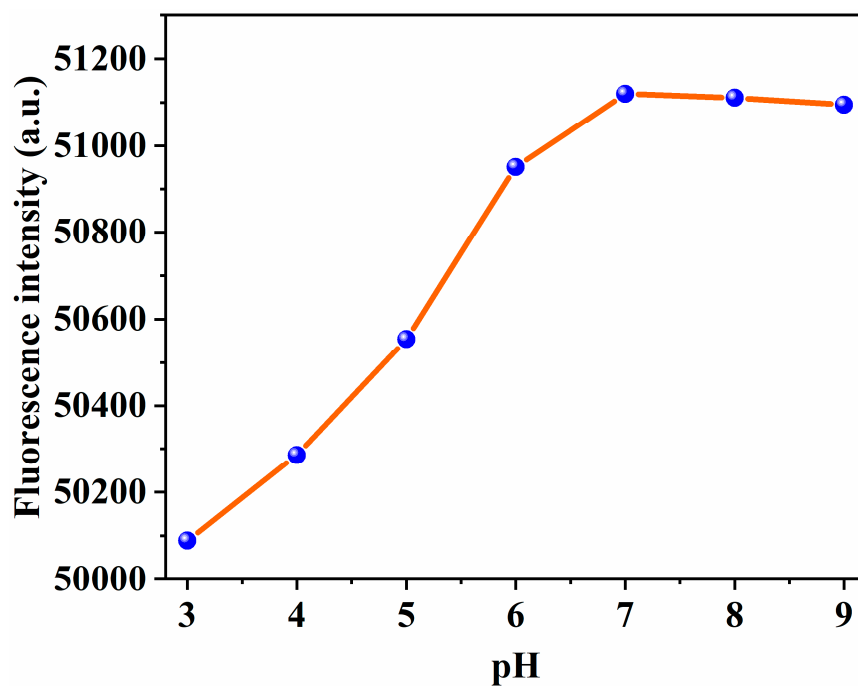

**Figure S4.** pH-induced change in fluorescence intensity of NS-CDs at room temperature.

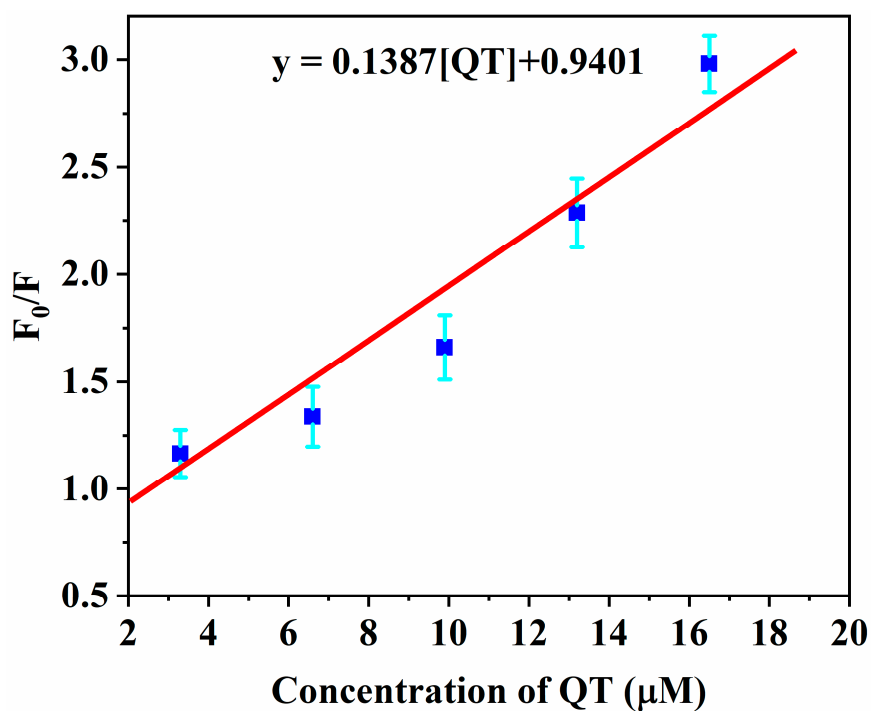

**Figure S5.** Stern–Volmer plot of the quenching of fluorescence of NS-CDs by QT in the concentration range of 3.3–16.5 μM.
